# Supplementary material
Source: PubMed Central journal article supplement (PMC4123391)
Supplement: CJN.05350513_CJN05350513SupplementaryData.pdf [file CJN.05350513_CJN05350513SupplementaryData.pdf]

## Appendix 1: Transplant Recipient Cohort by State (1987-2009)

Table A1 provides the cohort size by DSA for each of the study cohorts. The primary cohort includes all deceased donor kidney transplant recipients within each DSA from 1987-2009. The KDRI Controlled cohort includes all deceased donor kidney transplant recipients, adjusted for kidney quality using the kidney donor risk index during 1987-2009. The Additional Exclusions cohort includes all deceased donor kidney transplant recipients, excluding payback and zero-HLA mismatch kidneys as well as recipients under 18 years old during 1987-2009.

**Table A1: Additional Exclusions Cohort Population by DSA**

| <b>Transplant DSA</b> | <b>Primary Cohort Population (N)</b> | <b>KDRI Controlled Population (N)</b> | <b>Additional Exclusions Population (N)</b> |
|-----------------------|--------------------------------------|---------------------------------------|---------------------------------------------|
| CADN-OP1              | 6798                                 | 5167                                  | 5622                                        |
| CAGS-OP1              | 1434                                 | 1016                                  | 1175                                        |
| CAOP-OP1              | 9957                                 | 9660                                  | 8115                                        |
| CASD-IO1              | 2392                                 | 2326                                  | 2023                                        |
| FLFH-IO1              | 2156                                 | 693                                   | 1771                                        |
| FLMP-OP1              | 2255                                 | 1962                                  | 1938                                        |
| FLUF-IO1              | 3099                                 | 3065                                  | 2653                                        |
| FLWC-OP1              | 3353                                 | 878                                   | 2847                                        |
| NYAP-OP1              | 1299                                 | 970                                   | 1097                                        |
| NYFL-IO1              | 1256                                 | 1041                                  | 1071                                        |
| NYRT-OP1              | 7631                                 | 4915                                  | 6355                                        |
| NYWN-OP1              | 1112                                 | 1031                                  | 932                                         |
| OHLB-OP1              | 2654                                 | 2172                                  | 2045                                        |
| OHLC-OP1              | 1509                                 | 231                                   | 1214                                        |
| OHLP-OP1              | 2064                                 | 1340                                  | 1767                                        |
| OHOV-OP1              | 1147                                 | 807                                   | 1016                                        |
| NCCM-IO1              | 1370                                 | 601                                   | 1053                                        |
| NCNC-OP1              | 3533                                 | 3330                                  | 2707                                        |
| PADV-OP1              | 8967                                 | 8018                                  | 7502                                        |
| PATF-OP1              | 5362                                 | 4852                                  | 4678                                        |
| TNDS-OP1              | 3342                                 | 601                                   | 2590                                        |
| TNMS-OP1              | 1316                                 | 970                                   | 1165                                        |
| WIDN-OP1              | 1782                                 | 1294                                  | 1493                                        |
| WIUW-IO1              | 2951                                 | 2453                                  | 2443                                        |
| TXGC-OP1              | 5432                                 | 3328                                  | 4627                                        |
| TXSA-OP1              | 3073                                 | 1756                                  | 2457                                        |

|          |       |       |       |
|----------|-------|-------|-------|
| TXSB-OP1 | 5467  | 3883  | 4647  |
| Total    | 92711 | 68365 | 77003 |

Cohort sizes by DSA.

Abbreviations: DSA: Donor Service Area

The first two letters in a DSA names are abbreviated as: TN: Tennessee, NC: North Carolina, PA: Pennsylvania, WI: Wisconsin, FL: Florida, CA: California, NY: New York, OH: Ohio, TX: Texas;

Primary cohort: All kidney transplant recipients during the study period (1987-2009). Controlled-

KDRI: Cohort of all kidney transplant recipients, adjusted by KDRI. Additional Exclusions

cohort: Cohort of all deceased donor kidney transplant recipients excluding zero HLA mismatch, payback, and < 18 year old recipients

### ***KDRI-Controlled Cohort Construction***

We created four KDRI subgroups: [0, 0.75]; [0.75,1.5] [1.5, 2.25] [larger than 2.25] based on the primary cohort of kidney transplant recipients. The distribution among those subgroups was 9,978 (10.8%), 65,190 (70.3%), 15,537 (16.8%), and 2,006 (2.2%) patients in the four KDRI subgroups respectively. In order to control for KDRI, we created a matched cohort for each DSA, by matching the distribution per KDRI quartile (10.8%, 70.3%, 16.8% and 2.2%). For example, in the Florida OPO (FLMP-OP1) the primary cohort entailed 219, 1,655, 329 and 52 patients in each KDRI quartile respectively. The KDRI matched cohort entailed 211, 1,380, 329, and 42 patients respectively that were randomly selected (see Table A1). Similar procedure was repeated for all DSAs in the study to ensure that the number of patients selected to form the secondary cohort in each DSA was 10.76%, 70.31%, 16.76% and 2.16%.

**Table A2: Primary and KDRI-Controlled Cohort Populations by DSA and KDRI Range**

| Transplant DSA | Primary Cohort Population (N) |          |          |       | KDRI Controlled Cohort Population (N) |          |          |       |
|----------------|-------------------------------|----------|----------|-------|---------------------------------------|----------|----------|-------|
|                | 0-0.75                        | 0.75-1.5 | 1.5-2.25 | 2.25+ | 0-0.75                                | 0.75-1.5 | 1.5-2.25 | 2.25+ |
| CADN-OP1       | 556                           | 5013     | 1112     | 117   | 556                                   | 3633     | 866      | 112   |
| CAGS-OP1       | 154                           | 1006     | 252      | 22    | 109                                   | 715      | 170      | 22    |
| CAOP-OP1       | 1144                          | 6874     | 1730     | 209   | 1040                                  | 6792     | 1619     | 209   |
| CASD-IO1       | 299                           | 1643     | 390      | 60    | 250                                   | 1636     | 390      | 50    |
| FLFH-IO1       | 256                           | 1640     | 245      | 15    | 75                                    | 487      | 116      | 15    |
| FLMP-OP1       | 219                           | 1655     | 329      | 52    | 211                                   | 1380     | 329      | 42    |
| FLUF-IO1       | 341                           | 2155     | 533      | 70    | 330                                   | 2155     | 514      | 66    |

|          |       |       |       |      |       |       |       |      |
|----------|-------|-------|-------|------|-------|-------|-------|------|
| FLWC-OP1 | 460   | 2509  | 365   | 19   | 95    | 617   | 147   | 19   |
| NYAP-OP1 | 168   | 913   | 197   | 21   | 104   | 682   | 163   | 21   |
| NYFL-IO1 | 112   | 912   | 201   | 31   | 112   | 732   | 174   | 23   |
| NYRT-OP1 | 529   | 4806  | 1931  | 365  | 529   | 3456  | 824   | 106  |
| NYWN-OP1 | 123   | 725   | 230   | 34   | 111   | 725   | 173   | 22   |
| OHLB-OP1 | 279   | 1795  | 533   | 47   | 234   | 1527  | 364   | 47   |
| OHLC-OP1 | 198   | 1124  | 182   | 5    | 25    | 162   | 39    | 5    |
| OHLP-OP1 | 234   | 1507  | 294   | 29   | 144   | 942   | 225   | 29   |
| OHOV-OP1 | 87    | 841   | 195   | 24   | 87    | 568   | 135   | 17   |
| NCCM-IO1 | 168   | 1038  | 151   | 13   | 65    | 422   | 101   | 13   |
| NCNC-OP1 | 422   | 2342  | 668   | 101  | 358   | 2342  | 558   | 72   |
| PADV-OP1 | 863   | 5977  | 1772  | 355  | 863   | 5638  | 1344  | 173  |
| PATF-OP1 | 532   | 3760  | 965   | 105  | 522   | 3412  | 813   | 105  |
| TNDS-OP1 | 673   | 2366  | 290   | 13   | 65    | 422   | 101   | 13   |
| TNMS-OP1 | 157   | 938   | 200   | 21   | 104   | 682   | 163   | 21   |
| WIDN-OP1 | 205   | 1269  | 280   | 28   | 139   | 910   | 217   | 28   |
| WIUW-IO1 | 264   | 2088  | 543   | 56   | 264   | 1725  | 411   | 53   |
| TXGC-OP1 | 484   | 4187  | 689   | 72   | 358   | 2340  | 558   | 72   |
| TXSA-OP1 | 438   | 2126  | 471   | 38   | 189   | 1235  | 294   | 38   |
| TXSB-OP1 | 613   | 3981  | 789   | 84   | 418   | 2730  | 651   | 84   |
| Total    | 9978  | 65190 | 15537 | 2006 | 7358  | 48071 | 11457 | 1479 |
| %        | 10.8% | 70.3% | 16.8% | 2.2% | 10.8% | 70.3% | 16.8% | 2.2% |

Cohort sizes by DSA for primary and KDRI controlled cohort groups.

Abbreviations: DSA: Donor Service Area, KDRI: Kidney Donor Risk Index

The first two letters in a DSA names are abbreviated as: TN: Tennessee, NC: North Carolina, PA: Pennsylvania, WI: Wisconsin, FL: Florida, CA: California, NY: New York, OH: Ohio, TX: Texas;

Primary cohort: All kidney transplant recipients during the study period (1987-2009). Controlled-KDRI: Cohort of all waitlisted patients for kidney transplant, adjusted by KDRI.
